# Supplementary material for: Core–shell structured MgO@mesoporous silica spheres for enhanced adsorption of methylene blue and lead ions
Source: Royal Society of Chemistry journal article supplement (doi:10.1039/c5ra02596f), 2015-01-01
Supplement: c5ra02596f1.pdf [file c5ra02596f1.pdf]

## Supporting information

### Core-Shell Structured MgO@Mesoporous Silica Spheres for Enhanced Adsorption of Methylene Blue and Lead Ions

Chen-Xi Gui, Qian-Jie Li, Ling-Ling Lv, Jin Qu\*, Qian-Qian Wang, Shu-Meng Hao and Zhong-Zhen Yu\*

State Key Laboratory of Organic-Inorganic Composites, College of Materials Science and Engineering, Beijing University of Chemical Technology, Beijing 100029, China

\*Corresponding author. E-mail: [qujin@mail.buct.edu.cn](mailto:qujin@mail.buct.edu.cn) (J. Qu), [yuzz@mail.buct.edu.cn](mailto:yuzz@mail.buct.edu.cn) (Z.-Z. Yu)

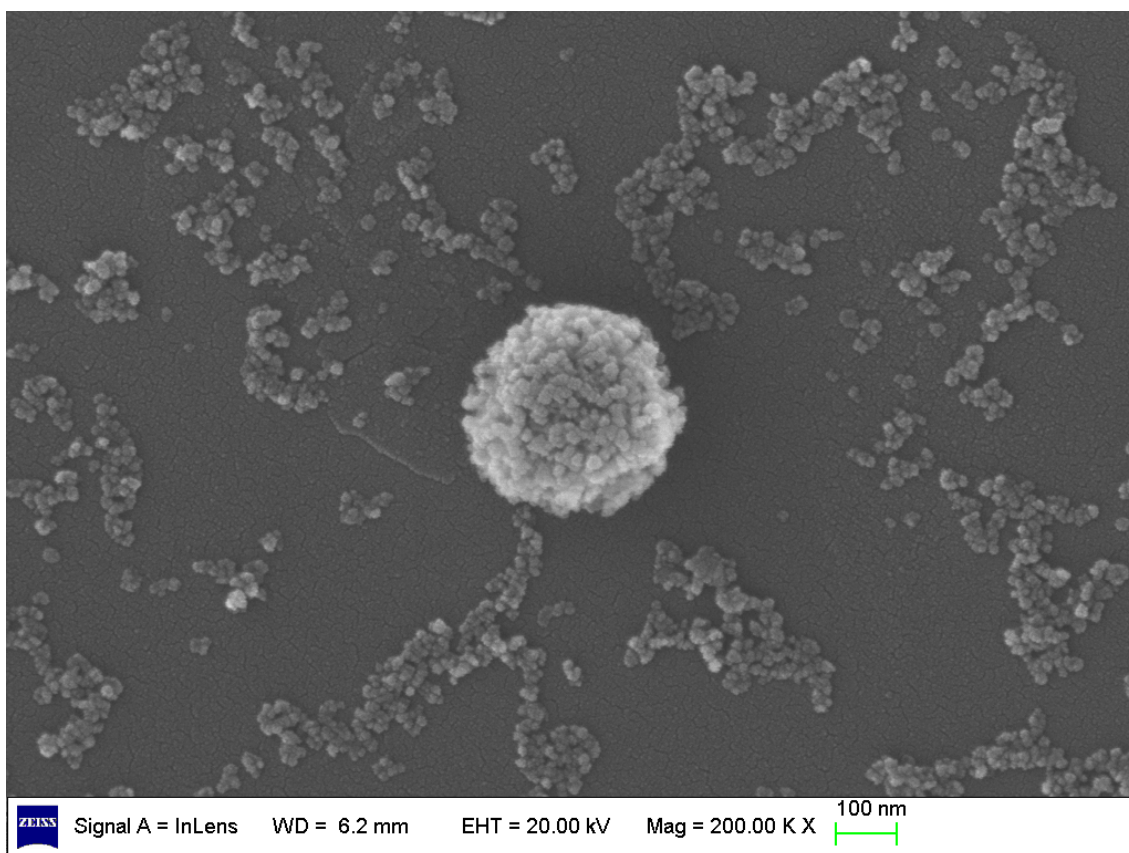

Figure S1 SEM image of MgO after adsorption.

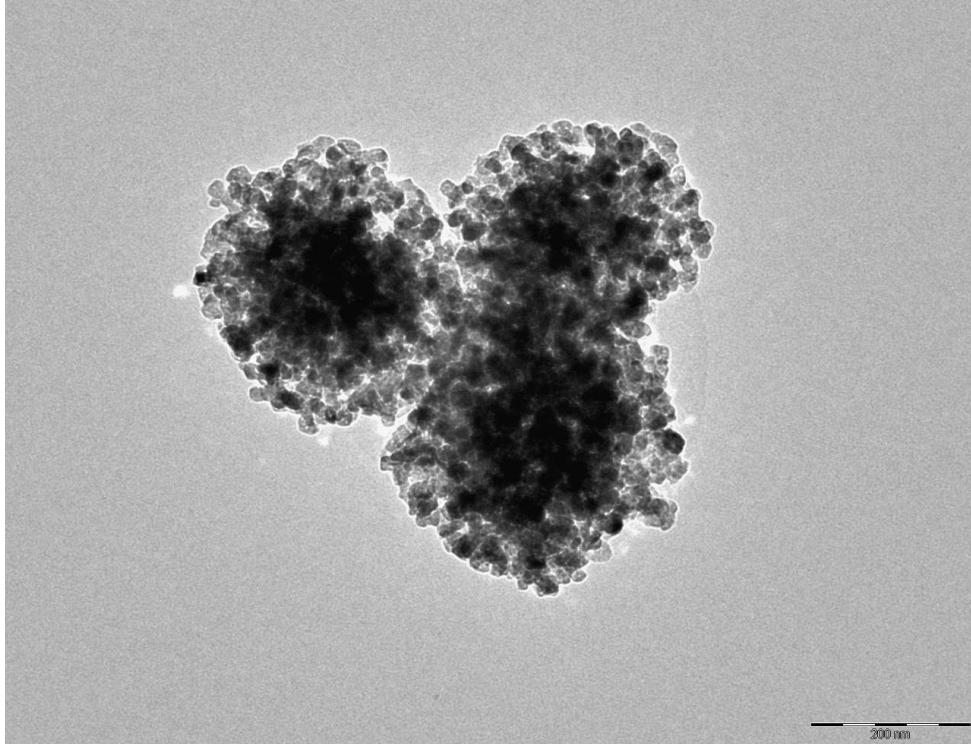

Figure S2 TEM image of MgO.

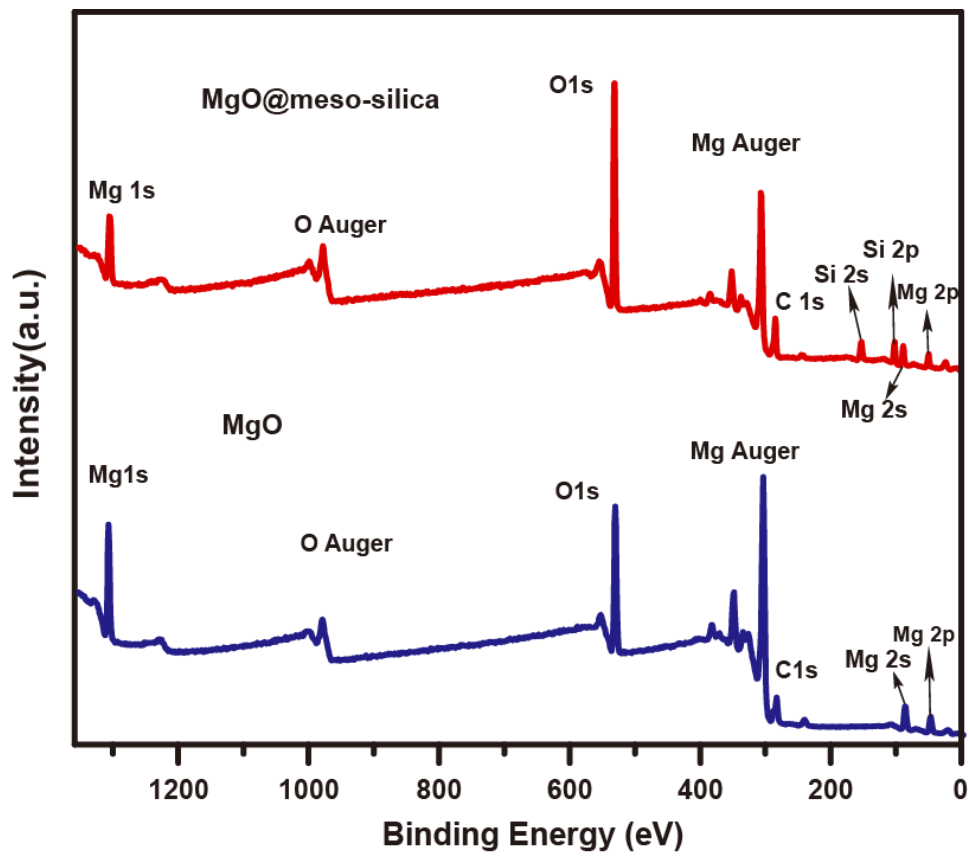

Figure S3 XPS spectra of MgO and MgO@meso-silica.

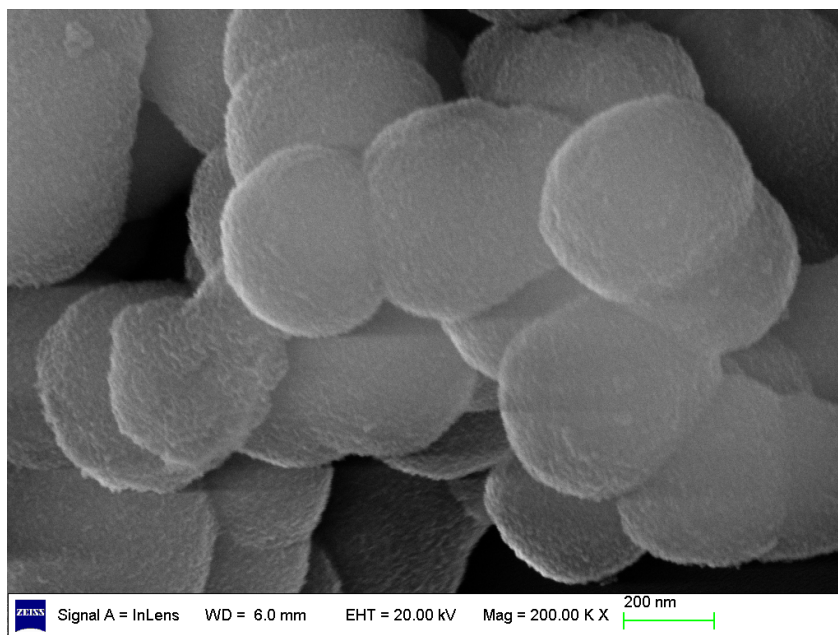

Figure S4 SEM image of MgO@meso-silica after adsorption.

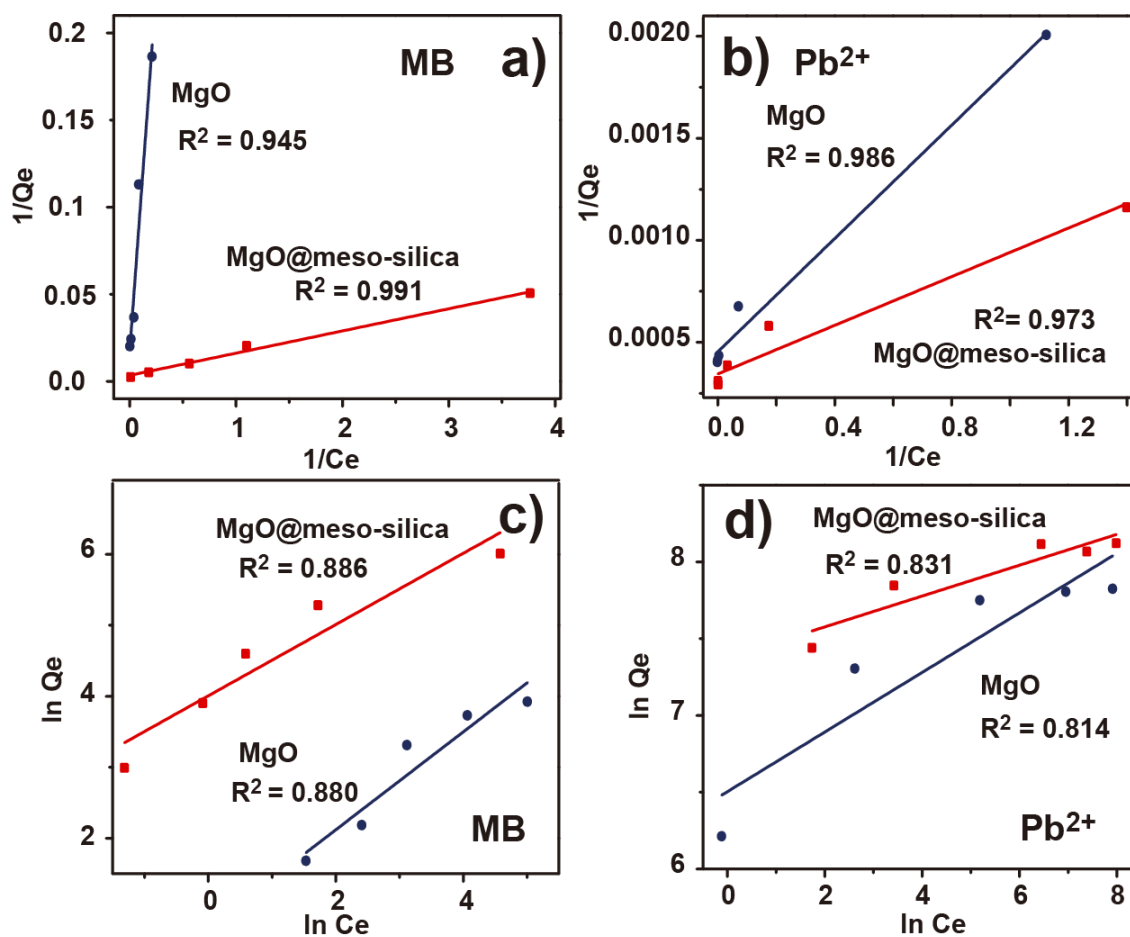

Figure

re S5 (a, b) The linear dependence of  $1/Q_e$  on  $1/C_e$  based on the Langmuir isotherm model; (c, d) The linear dependence of  $\ln Q_e$  on  $\ln C_e$  based on the Freundlich isotherm model.

**Table S1.** Maximum adsorption capacities of different adsorbents for Pb<sup>2+</sup> and MB.

| Adsorbents                                  | Adsorbates       | Qm<br>(mg/g) | Ref. |
|---------------------------------------------|------------------|--------------|------|
| MgO nanoparticles                           | Acid Red 112     | 93.0         | 1    |
| MgO nanoparticles                           | Vat Blue 6       | 86.5         | 2    |
| Spindle magnesium silicate                  | MB               | 141          | 3    |
| Flowerlike MgO                              | Pb <sup>2+</sup> | 1980         | 4    |
| Mesoporous MgO                              | Pb <sup>2+</sup> | 99.9         | 5    |
| MgSi hollow sphere                          | Pb <sup>2+</sup> | 300          | 6    |
| Carboxylic-functionalized mesoporous silica | MB               | 110          | 7    |
| Mesoporous silica                           | MB               | 189          | 8    |
| MCM-41                                      | MB               | 131.8        | 9    |
| MCM-41                                      | MB               | 54           | 10   |
| Mesoporous silica                           | Pb <sup>2+</sup> | 85.4         | 11   |
| Amino-functionalized mesoporous silica      | Pb <sup>2+</sup> | 89.1         | 12   |
| Mercapto-functionalized mesoporous silica   | Pb <sup>2+</sup> | 20.7         | 12   |

## References

1. T. G. Venkatesha, Y. Arthoba Nayaka and B. K. Chethana, Adsorption of Ponceau S from aqueous solution by MgO nanoparticles, *Appl. Surf. Sci.*, 2013, **276**, 620-627.
2. T. G. Venkatesha, R. Viswanatha, Y. Arthoba Nayaka and B. K. Chethana, Kinetics and thermodynamics of reactive and vat dyes adsorption on MgO nanoparticles, *Chem. Eng. J.*, 2012, **198-199**, 1-10.
3. J. Zheng, C. Cheng, R. W. Yan, W. J. Fang, C. Chen, H. X. Huai and C. C. Wang, Synthesis of yolk-shell magnetic magnesium silicate with tunable yolk morphology for removal of methylene blue in water, *J. Alloys Compd.*, 2014, **596**, 5-9.
4. C. Y. Cao, J. Qu, F. Wei, H. Liu and W. G. Song, Superb adsorption capacity and mechanism of flowerlike magnesium oxide nanostructures for lead and cadmium ions, *ACS Appl. Mater. Interfaces*, 2012, **4**, 4283-4287.
5. C. L. Gao, W. L. Zhang, H. B. Li, L. M. Lang and Z. Xu, Controllable fabrication of mesoporous MgO with various morphologies and their absorption performance for toxic pollutants in water, *Cryst. Growth Des.*, 2014, **8**, 4283-4287.

6. Y. Q. Wang, G. Z. Wang, H. Q. Wang, C. H. Liang, W. P. Cai and L. D. Zhang, Chemical-template synthesis of micro/nanoscale magnesium silicate hollow spheres for waste-water treatment, *Chem. Eur. J.*, 2010, **16**, 3497-3503.
7. Z. Yan, S. Y. Tao, J. X. Yin and G. T. Li, Mesoporous silicas functionalized with a high density of carboxylate groups as efficient absorbents for the removal of basic dyestuffs, *J. Mater. Chem.*, 2006, **16**, 2347-2353.
8. W. C. Chang, J. R. Deka, H. Y. Wu, F. K. Shieh, S. Y. Huang and H. M. Kao, Synthesis and characterization of large pore cubic mesoporous silicas functionalized with high contents of carboxylic acid groups and their use as adsorbents, *Appl. Catal. B: Environ.*, 2013, **142-143**, 817-827.
9. S. B. Wang and H. T. Li, Structure directed reversible adsorption of organic dye on mesoporous silica in aqueous solution, *Micropor. Mesopor. Mater.*, 2006, **97**, 21-26.
10. K. Y. Ho, G. McKay and K. L. Yeung, Selective adsorbents from ordered mesoporous silica, *Langmuir*, 2003, **19**, 3019-3024.
11. H. Yang, R. Xu, X. M. Xue, F. T. Li and G. T. Li, Hybrid surfactant-templated mesoporous silica formed in ethanol and its application for heavy metal removal, *J. Hazard. Mater.*, 2008, **152**, 690-698.
12. M. Machida, B. Fotoohi, Y. Amamo and L. Mercier, Cadmium (II) and lead (II) adsorption onto hetero-atom functional mesoporous silica and activated carbon, *Appl. Surf. Sci.*, 2012, **258**, 7389-7394.
